# Supplementary material for: Facilitators and Barriers to Early-Stage Dementia Care: A Qualitative Study on the Perspectives of Persons with Dementia, Informal Caregivers, and Healthcare Professionals
Source: Research Square preprint supplement (doi:10.21203/rs.3.rs-6863817/v1), 2025-09-19
Supplement: Supplementary file 1 [file b8f7cbf6223a7482bc4cd0b1.docx]

‘Eerder Erbij’: how can we reach people with dementia and their caregivers in an earlier phase?

About half of all people with dementia living at home do not receive any professional help or support and rely entirely on their partner, family or friends. By reaching them at an earlier stage in the disease, we can do more to help them live as well as possible with dementia. Many healthcare professionals indicate that they often reach people with dementia too late. By that time, many family caregivers are already overwhelmed by the burden of care, and admission to nursing home is often imminent.

Therefore, we would like to work with healthcare professionals to map out what is currently being done to reach this group and what works: for example, what might work in small communities may not work in a city, and vice versa. That is why we are asking you to answer a few questions in this questionnaire, so that in the end we can develop a practical guide for healthcare professionals and volunteers in elderly care with an overview of strategies that have been proven to help reach people with dementia and their family caregivers in an earlier phase.

Eventually, we want to develop an intervention, which will largely focus on the symptoms and progression of dementia, how to deal with changes in behaviour and communication, and the burden on family caregivers. The exact content has not yet been determined, as it will be shaped by the answers provided by the healthcare professionals, family caregivers, and people with dementia in these questionnaires.

Below you will find several questions. For each question, please select the answer that best applies. If you would like to add any additional comments, you can do so next to the relevant question or use the space at the end of the questionnaire.

Once you have completed the questionnaire, please fold it in half and return it to us using the enclosed envelope. No postage is needed.

If you have any questions or comments, please feel free to contact one of the researchers at Vrije Universiteit Amsterdam:

Drs. Sanne Balvert Dr. Maarten Milders

Van der Boechorststraat 7 Van der Boechorststraat 7

1081 BT Amsterdam 1081 BT Amsterdam

Tel. 020 5983293 Tel. 020 5986609

E-mail s.c.e.balvert@vu.nl E-mail [m.v.milders@vu.nl](mailto:m.v.milders@vu.nl)

Name: …………………………….. Date: …………………………….

1. **In which region do you work?**

Place: ………………………………………….……………………………………………………………………………………..

Province: ………………………………………….……………………………………………………………………………………..

1. **What is your highest level of education?**

- MBO
- HBO
- WO
- Other: …………………………………………………………………………………………………………….

1. **Did this level of education fall within the sector elderly care?**

- Yes, namely: ……………………………………………………………………………………………………………………..
- No

1. **What is your function within the elderly care?**

.………………………………………………………………………………….……………………………………..…………………………

………………………………………….…………………………………………………………………………………………………………………………………………………………………………………………………………………………………………….………………….

1. **How long have you been working in this position?**

.………………………………………………………………………………….……………………………………..…………………………

1. **How long have you been working in the elderly care?**

.………………………………………………………………………………….……………………………………..…………………………

The following questions are about how you come into contact with new clients. Think for example about your collaboration with case managers, general practitioners, domestic care, district nurses or other (welfare) organisations. How are new people registered at your organisation?

1. **How do people with dementia end up at your organisation?**

.………………………………………………………………………………….……………………………………..…………………………

………………………………………….…………………………………………………………………………………………………………………………………………………………………………………………………………………………………………….………………….

.………………………………………………………………………………….……………………………………..…………………………

………………………………………….…………………………………………………………………………………………………………………………………………………………………………………………………………………………………………….………………….

.………………………………………………………………………………….……………………………………..…………………………

1. **Which other organizations do you collaborate with in this regard?**

.………………………………………………………………………………….……………………………………..…………………………

………………………………………….…………………………………………………………………………………………………………………………………………………………………………………………………………………………………………….………………….

.………………………………………………………………………………….……………………………………..…………………………

………………………………………….…………………………………………………………………………………………………………………………………………………………………………………………………………………………………………….………………….

The following questions are about what your organisation does to reach people in an earlier phase. Think for example about preventive home visits, giving training when something is ‘not quite right’ (in Dutch ‘niet-pluis gevoel’) in the neighbourhood, cooperations with neighbourhood centers or walk-in centers or inviting people with memory problem to come volunteer. What does your organisation do in addition to the ‘normal route’?

1. **What does your organisation do to reach people with dementia (earlier)?**

.………………………………………………………………………………….……………………………………..…………………………

………………………………………….…………………………………………………………………………………………………………………………………………………………………………………………………………………………………………….………………….

.………………………………………………………………………………….……………………………………..…………………………

………………………………………….…………………………………………………………………………………………………………………………………………………………………………………………………………………………………………….………………….

.………………………………………………………………………………….……………………………………..…………………………

………………………………….…………………………………………………………………………………………………………………………………………………….…………………………………………………………………………………………………………………

1. **Which strategies are successful in this respect? What makes reaching people easier?**

.………………………………………………………………………………….……………………………………..…………………………

………………………………………….…………………………………………………………………………………………………………………………………………………………………………………………………………………………………………….………………….

.………………………………………………………………………………….……………………………………..…………………………

………………………………………….…………………………………………………………………………………………………………………………………………………………………………………………………………………………………………….………………….

.………………………………………………………………………………….……………………………………..…………………………

1. **Which strategies do not work here? What makes reaching people more difficult?**

.………………………………………………………………………………….……………………………………..…………………………

………………………………………….……………………………………………………………………………………………………….…………………………………………………………………………………………………………………………………….………………….

.………………………………………………………………………………….……………………………………..……………………….…

………………………………………….……………………………………………………………………………………………………….…………………………………………………………………………………………………………………………………….………………….

The following questions are about what people with dementia and caregivers need when they first contact your organisation. These questions are about the very first phase in which they use assistance such as domestic care or day care.

1. **When people with dementia and their caregivers first use professional assistance, what is particularly important in this phase?**

.………………………………………………………………………………….……………………………………..…………………………

………………………………………….…………………………………………………………………………………………………………………………………………………………………………………………………………………………………………….………………….

.………………………………………………………………………………….……………………………………..…………………………

………………………………………….…………………………………………………………………………………………………………………………………………………………………………………………………………………………………………….………………….

.………………………………………………………………………………….……………………………………..…………………………

………………………………….…………………………………………………………………………………………………………………………………………………….…………………………………………………………………………………………………………………

1. **Based on your experience in elderly care, when do you think is the right time for professional assistance? Or when is the assistance too late?**

.………………………………………………………………………………….……………………………………..…………………………

………………………………………….…………………………………………………………………………………………………………………………………………………………………………………………………………………………………………….………………….

.………………………………………………………………………………….……………………………………..…………………………

………………………………………….…………………………………………………………………………………………………………………………………………………………………………………………………………………………………………….………………….

.………………………………………………………………………………….……………………………………..…………………………

………………………………….…………………………………………………………………………………………………………………………………………………….…………………………………………………………………………………………………………………

The next questions are about any courses or support offered within your organisation. Think for example about peer support, education or respite care. What is already offered by your your organisation

1. **What does your organisation offer to people with dementia?**

.………………………………………………………………………………….……………………………………..…………………………

………………………………………….…………………………………………………………………………………………………………………………………………………………………………………………………………………………………………….………………….

.………………………………………………………………………………….……………………………………..…………………………

………………………………………….…………………………………………………………………………………………………………………………………………………………………………………………………………………………………………….………………….

.………………………………………………………………………………….……………………………………..…………………………

………………………………….…………………………………………………………………………………………………………………………………………………….…………………………………………………………………………………………………………………

1. **What does your organisation offer to caregivers of people with dementia?**

.………………………………………………………………………………….……………………………………..…………………………

………………………………………….…………………………………………………………………………………………………………………………………………………………………………………………………………………………………………….………………….

.………………………………………………………………………………….……………………………………..…………………………

………………………………………….…………………………………………………………………………………………………………………………………………………………………………………………………………………………………………….………………….

.………………………………………………………………………………….……………………………………..…………………………

………………………………….…………………………………………………………………………………………………………………………………………………….…………………………………………………………………………………………………………………

1. **Does your organisation also offer courses for people with dementia and caregivers together?** Think for example about group meetings for both.

.………………………………………………………………………………….……………………………………..…………………………

………………………………………….…………………………………………………………………………………………………………………………………………………………………………………………………………………………………………….………………….

.………………………………………………………………………………….……………………………………..…………………………

………………………………………….…………………………………………………………………………………………………………………………………………………………………………………………………………………………………………….………………….

.………………………………………………………………………………….……………………………………..…………………………

………………………………….…………………………………………………………………………………………………………………………………………………….…………………………………………………………………………………………………………………

At the moment we are developing support for people with dementia and caregivers. The following questions are about what your (new) clients need in general. Think for example about a permanent contact person within care, accessibility, focus on positivity, continuity, social network or coordination with personal preferences.

1. **What information and support do your clients need? What should be the focal points for a new support approach?**

.………………………………………………………………………………….……………………………………..…………………………

………………………………………….…………………………………………………………………………………………………………………………………………………………………………………………………………………………………………….………………….

.………………………………………………………………………………….……………………………………..…………………………

………………………………………….…………………………………………………………………………………………………………………………………………………………………………………………………………………………………………….………………….

.………………………………………………………………………………….……………………………………..…………………………

………………………………….…………………………………………………………………………………………………………………………………………………….…………………………………………………………………………………………………………………

1. **What kind of information and support would you yourself like to offer to clients? What do you think is best for people in this (earlier) phase of dementia?**

.………………………………………………………………………………….……………………………………..…………………………

………………………………………….…………………………………………………………………………………………………………………………………………………………………………………………………………………………………………….………………….

.………………………………………………………………………………….……………………………………..…………………………

………………………………………….…………………………………………………………………………………………………………………………………………………………………………………………………………………………………………….………………….

.………………………………………………………………………………….……………………………………..…………………………

………………………………….…………………………………………………………………………………………………………………………………………………….…………………………………………………………………………………………………………………

1. **When, in your opinion, will people with dementia and their caregivers have no need for information and support?** Think for example about diagnosis not yet accepted, caregiver overburdened or uncertainty or doubt with clients.

.………………………………………………………………………………….……………………………………..…………………………

………………………………………….…………………………………………………………………………………………………………………………………………………………………………………………………………………………………………….………………….

.………………………………………………………………………………….……………………………………..…………………………

………………………………………….…………………………………………………………………………………………………………………………………………………………………………………………………………………………………………….………………….

.………………………………………………………………………………….……………………………………..…………………………

………………………………….…………………………………………………………………………………………………………………………………………………….………………………………………………………………………………………………………………….

1. **Is there anything that you would like to add, which we did not ask?**

.………………………………………………………………………………….……………………………………..…………………………

………………………………………….…………………………………………………………………………………………………………………………………………………………………………………………………………………………………………….………………….

.………………………………………………………………………………….……………………………………..…………………………

………………………………………….…………………………………………………………………………………………………………………………………………………………………………………………………………………………………………….………………….

.………………………………………………………………………………….……………………………………..…………………………

………………………………….…………………………………………………………………………………………………………………………………………………….…………………………………………………………………………………………………………………

1. **Do you have any questions for us? If necessary, we can contact you.**

.………………………………………………………………………………….……………………………………..…………………………

………………………………………….…………………………………………………………………………………………………………………………………………………………………………………………………………………………………………….………………….

**Do you have any further comments or suggestions?**

…………………………………………………………………………………………………………………………………………………………………………………………………………………………………………………………………………………………………………………………………………………………………………………………………………………………………………………………………………………………………………………………………………………………………………………………………………………………………………………………………………………………………………………………………………….……………………………………….

………………………………………………………………………………………………………………………………………………………………………………………………………………………………………………………………………………………………………………………………………………………………………………………………………………………………………………………………………………………………………………………………………………………………………………………………………………………………………………………………………………………………………………………………………………………………………………………………………………………………………………………………………………………………………………………………………………………………………………………………………………………………………………………………………………………………………………………………………………………………………………………………………………………………………………………………………………………………………………………………………………………………………………………………………………………

Thank you very much for completing this questionnaire!
